# Supplementary material for: Distinct Functional Constraints Partition Sequence Conservation in a cis-Regulatory Element
Source: PubMed Central journal article supplement (PMC3107193; doi:10.1371/journal.pgen.1002095), 2011-06-02
Supplement: pgen.1002095.s001.pdf [file pgen.1002095.s001.pdf]

|       |             |             |             |             |             |             |             |             |             |             |     |
|-------|-------------|-------------|-------------|-------------|-------------|-------------|-------------|-------------|-------------|-------------|-----|
| C.ele | A-----TTTC  | AATCGGCCAAA | TTGT-----   | ----GCACAT  | -----CCTAT  | GAATTTTCCT  | ACATCTATTT  | TGAAAAGTAA  | GC-----AAA  | TTCTATGAAA  |     |
| C.bri | AGACAACCTC  | AAAAAGTATA  | TTGTTGAACG  | ACGGCTTGGT  | GACAGTCGAA  | AGGCCTGAC   | TAGTCGATTA  | CCGGTGGTTG  | GTGGACCAAA  | TTTCTGGAGA  |     |
| C.rem | A-----CTC   | AGAAA---AA  | TTTT-----G  | TTTTTTAATT  | -----TCTAA  | AAAATTTAAT  | TGG---ATCT  | TGAGTTCTCA  | GT----CGAA  | CTTA-AAGAA  |     |
| C.bre | G-----TGC   | AAATG---TA  | TTCCTATCAG  | ATCTCCAGAT  | -----CAGAG  | AAGTTTCGAA  | TGC---ATCA  | AGACTTTTCA  | CT----TACA  | GTTC-GGATA  |     |
|       | ..... ..... | ..... ..... | ..... ..... | ..... ..... | ..... ..... | ..... ..... | ..... ..... | ..... ..... | ..... ..... | ..... ..... |     |
|       |             | 510         | 520         | 530         | 540         | 550         | 560         | 570         | 580         | 590         | 600 |
| C.ele | ATATCTAAAG  | AAAAATGGAA  | AAAATTT---  | --TCA-----  | ---AAAAGGC  | ACA----GTT  | TTAAGTGTTT  | CC----GTCT  | A---ATAAAA  | AAATCCCCCT  |     |
| C.bri | ATGGAACATT  | TTGTCAAAAA  | TTACTTTTGG  | AATTATCACA  | CTATAAAAGT  | CAAAGAGGAC  | TCTGGGAATC  | TTCAAAATTT  | ATTATTAGAA  | GTATGCGGAC  |     |
| C.rem | CTGGTACATT  | TGAGG--AAG  | CGAGACC---  | -ATTG-----  | ---GAAAGGA  | GTA---TGAG  | CCACGTCATT  | ---AAATTGT  | G---GTAAGA  | -TACTTACTC  |     |
| C.bre | TCATTACAGG  | ACAAGTTGAA  | CGAATCC---  | -TCAGTCTCA  | CACGGAAGGT  | GTAGTCCAAT  | TGATATCATC  | CA-AAACCGT  | ATTTGTAGTG  | -AAACTAAGT  |     |
|       | ..... ..... | ..... ..... | ..... ..... | ..... ..... | ..... ..... | ..... ..... | ..... ..... | ..... ..... | ..... ..... | ..... ..... |     |
|       |             | 610         | 620         | 630         | 640         | 650         | 660         | 670         | 680         | 690         | 700 |
| C.ele | AAACTTCC    | GGC--AAATT  | GATGTTCGGC  | AAATGGCAAA  | TC-----     | GGAAACTTGC  | CGAAAAT---  | -----       | TACAGTTTCC  | GGTAA-----  |     |
| C.bri | AAAAATGACC  | CATTTATATT  | CAGAAGAAAT  | CTCGAAAACG  | TTTTTTTTTT  | GAAAACCAAG  | AGAAGAATGC  | GCCTGAACAG  | TGATGCTTAT  | CGAGGTAATA  |     |
| C.rem | AATGAAGATT  | C----ACATC  | CAAAAACCTGA | TCACAAGGCG  | TA-----     | GAAAGAACTG  | TGAACTG---  | -----       | TAATTCTTTC  | GGACG-----  |     |
| C.bre | AGAGAAGTTT  | CG---AGATC  | TCGTTGCCAT  | CCATAAAAAA  | AC-----     | GAAAACGCTG  | TCATGTAAAT  | CCGGGA---   | TGCTGCTTGC  | AGACATAAAT  |     |
|       | ..... ..... | ..... ..... | ..... ..... | ..... ..... | ..... ..... | ..... ..... | ..... ..... | ..... ..... | ..... ..... | ..... ..... |     |
|       |             | 710         | 720         | 730         | 740         | 750         | 760         | 770         | 780         | 790         | 800 |
| C.ele | -ATCGGCAAA  | CCGGCAAACCT | -----GC     | CTGAATTGAA  | AAGTTCCGTC  | AAATCGGCAA  | ACCGACAACA  | CCCCTGGCAC  | AAATGATGGA  | CATACTGAGG  |     |
| C.bri | TAAAGACTTC  | AGGACTTAAC  | AATAAAACAA  | ATGCGTCCAG  | GAATTTTTGA  | AGCGGGTCTA  | GCCAATGTTT  | TTTTTCTTTT  | TCAAAATCCC  | TTTCTGTGAA  |     |
| C.rem | -ATTGGATAC  | TAG-CGGAAT  | -----       | ACTC-T--AC  | AAAT-----A  | ATGAG---AA  | ACCAAGACCT  | GATTTTACCT  | GAAAAGCTCT  | TCTCCGTGAA  |     |
| C.bre | AATCTATTTT  | TAA-CAGATT  | TGAGAGTGGA  | ATTCGT--AA  | GAAT-----C  | AGGAGCGAAA  | ATTAATGACA  | AATGACAGGT  | AGTGAGATGG  | AAAACCTAGGA |     |
|       | ..... ..... | ..... ..... | ..... ..... | ..... ..... | ..... ..... | ..... ..... | ..... ..... | ..... ..... | ..... ..... | ..... ..... |     |
|       |             | 810         | 820         | 830         | 840         | 850         | 860         | 870         | 880         | 890         | 900 |
| C.ele | CAATTTGCCG  | GT-----     | -----TT     | TCCAATTGCA  | GGAAATTTT-  | ---CAATTCC  | GGCAGTGTGC  | CGA-----    | TTTGCCGGAA  | ATTTTAATTC  |     |
| C.bri | AAATGATGCC  | GTGAGATGAA  | GTCCCAAATT  | TAGAAAAGTT  | TCAAACATTG  | AAACAACACA  | TTTGAGGAAT  | AGGCTCTTCT  | TATTTTAGTA  | GCCAAGCAAC  |     |
| C.rem | GAAA-----   | CT-----     | -----       | ---AAAAACA  | ACTGTCTT--  | ---CACTTGA  | AATGAAG---  | -----       | -----TGAAA  | ACAAAAAAGA  |     |
| C.bre | GAAGGTTTCT  | CT-----     | -----       | ---CAAAGTT  | TTGACCTT--  | ---CAGTCCA  | ACTGAAGAGT  | -----T      | TTCGATGGAA  | GTTGAAACAA  |     |



```

1400
C.ele AAAAAAGAAGA GCCTTTCGGT TTGGAGAGTA GGGTCTAATA ATCCCCCGTG CTCTTCAAAT CATTGTGCCA ACACACAGAC ACACTTTATG TGTGCTCACA
C.bri AAGAAGAAGA GTCTTC---- --GGAGAAGA GCGTCTAATA ATCCCTG--- --CTTCAAAT CATTGTGCCA ACACA~~GAC ACACTTTATG GG~~CCAGAA
C.rem ---AAGAAGA GCCTC----- -----GGA GCGTCTAATA ATCCCTG--- --CTTCAAAT CATTGTGCCA ACACA~~~~C ACACTTTATG TG--CCCA--
C.bre ---AAGAAGA GCCTC----- -----GGA GCGTCTAATA ATCCCTG--- --CTTCAAAT CATTGTGCCA ACACA~~~~C ACACTTTATG TGTGCCCA--

.....|.....| .....|.....| .....|.....| .....|.....| .....|.....| .....|.....| .....|.....| .....|.....| .....|.....|
1410 1420 1430 1440 1450 1460 1470 1480 1490

1500
C.ele CACACACGCT ATTTGAAGAG CGAAGACGAC GAC-----G ACGCATTTCAG A-GCTCTTTT CCACGAAATT TGCTCCATCT TTCCACAATC
C.bri C---CACGCT ATTTGAAGAG CAACGACGAC GAT-GACG-- AGCGCCAAG AGGTCTCCAG A-GCT-CTTT TCACAAATTC ----TCTTCT TTCAA-AACC
C.rem ----CACGCT ATTTGAAGAG CGAAGAAGAC GACCGA---T GACGACCTCG ACGTCTTCAG ACGCT-CTTT TCAAAAAATT ----CTTTCT TTTCA-AATC
C.bre ----CACGCT ATTTGAAGAG CGAAGAAGAC GTCCGACGAT GACGACGACG ACGTCTTCAG ACCCTTCTTT TCACGAATTT ----CTTATT TTTTCG-AATT

.....|.....| .....|.....| .....|.....| .....|.....| .....|..
1510 1520 1530 1540
C.ele TGTCTTTCCT GTGAGACGAC AGCGTCACAT TTATTTTCATT ACAGATG
C.bri GGTGGTTCCT TTCAAGT--- --TTGT--GT TTCCT-TACA G-ACATG
C.rem GGTCTTCCTG CT-ACAT--- --TT----AT TTCGT-TACA GAAGATG
C.bre TGTCTTACTT CTCATAC--- --CTCTCAAT TTCGTATTTT ACAGATG

```

*C.ele*=*C. elegans*; *C.bri*=*C. briggsae*; *C.rem*=*C. remanei*; *C.bre*=*C. brenneri*. All genomic sequences are available on Wormbase (<http://wormbase.org/>). Alignment was carried out using BioEdit (Hall, 1999) ClustalW Multiple Alignment function and was edited manually. All sequences terminate with the start codon of the *unc-47* ortholog.

1. Hall, T.A. (1999) BioEdit: a user-friendly biological sequence alignment editor and analysis program for Windows 95/98/NT. Nucl. Acids. Symp. Ser. 41:95-98.
