# Supplementary material for: Distinct Functional Constraints Partition Sequence Conservation in a cis-Regulatory Element
Source: PubMed Central journal article supplement (PMC3107193; doi:10.1371/journal.pgen.1002095), 2011-06-02
Supplement: pgen.1002095.s004.pdf [file pgen.1002095.s004.pdf]

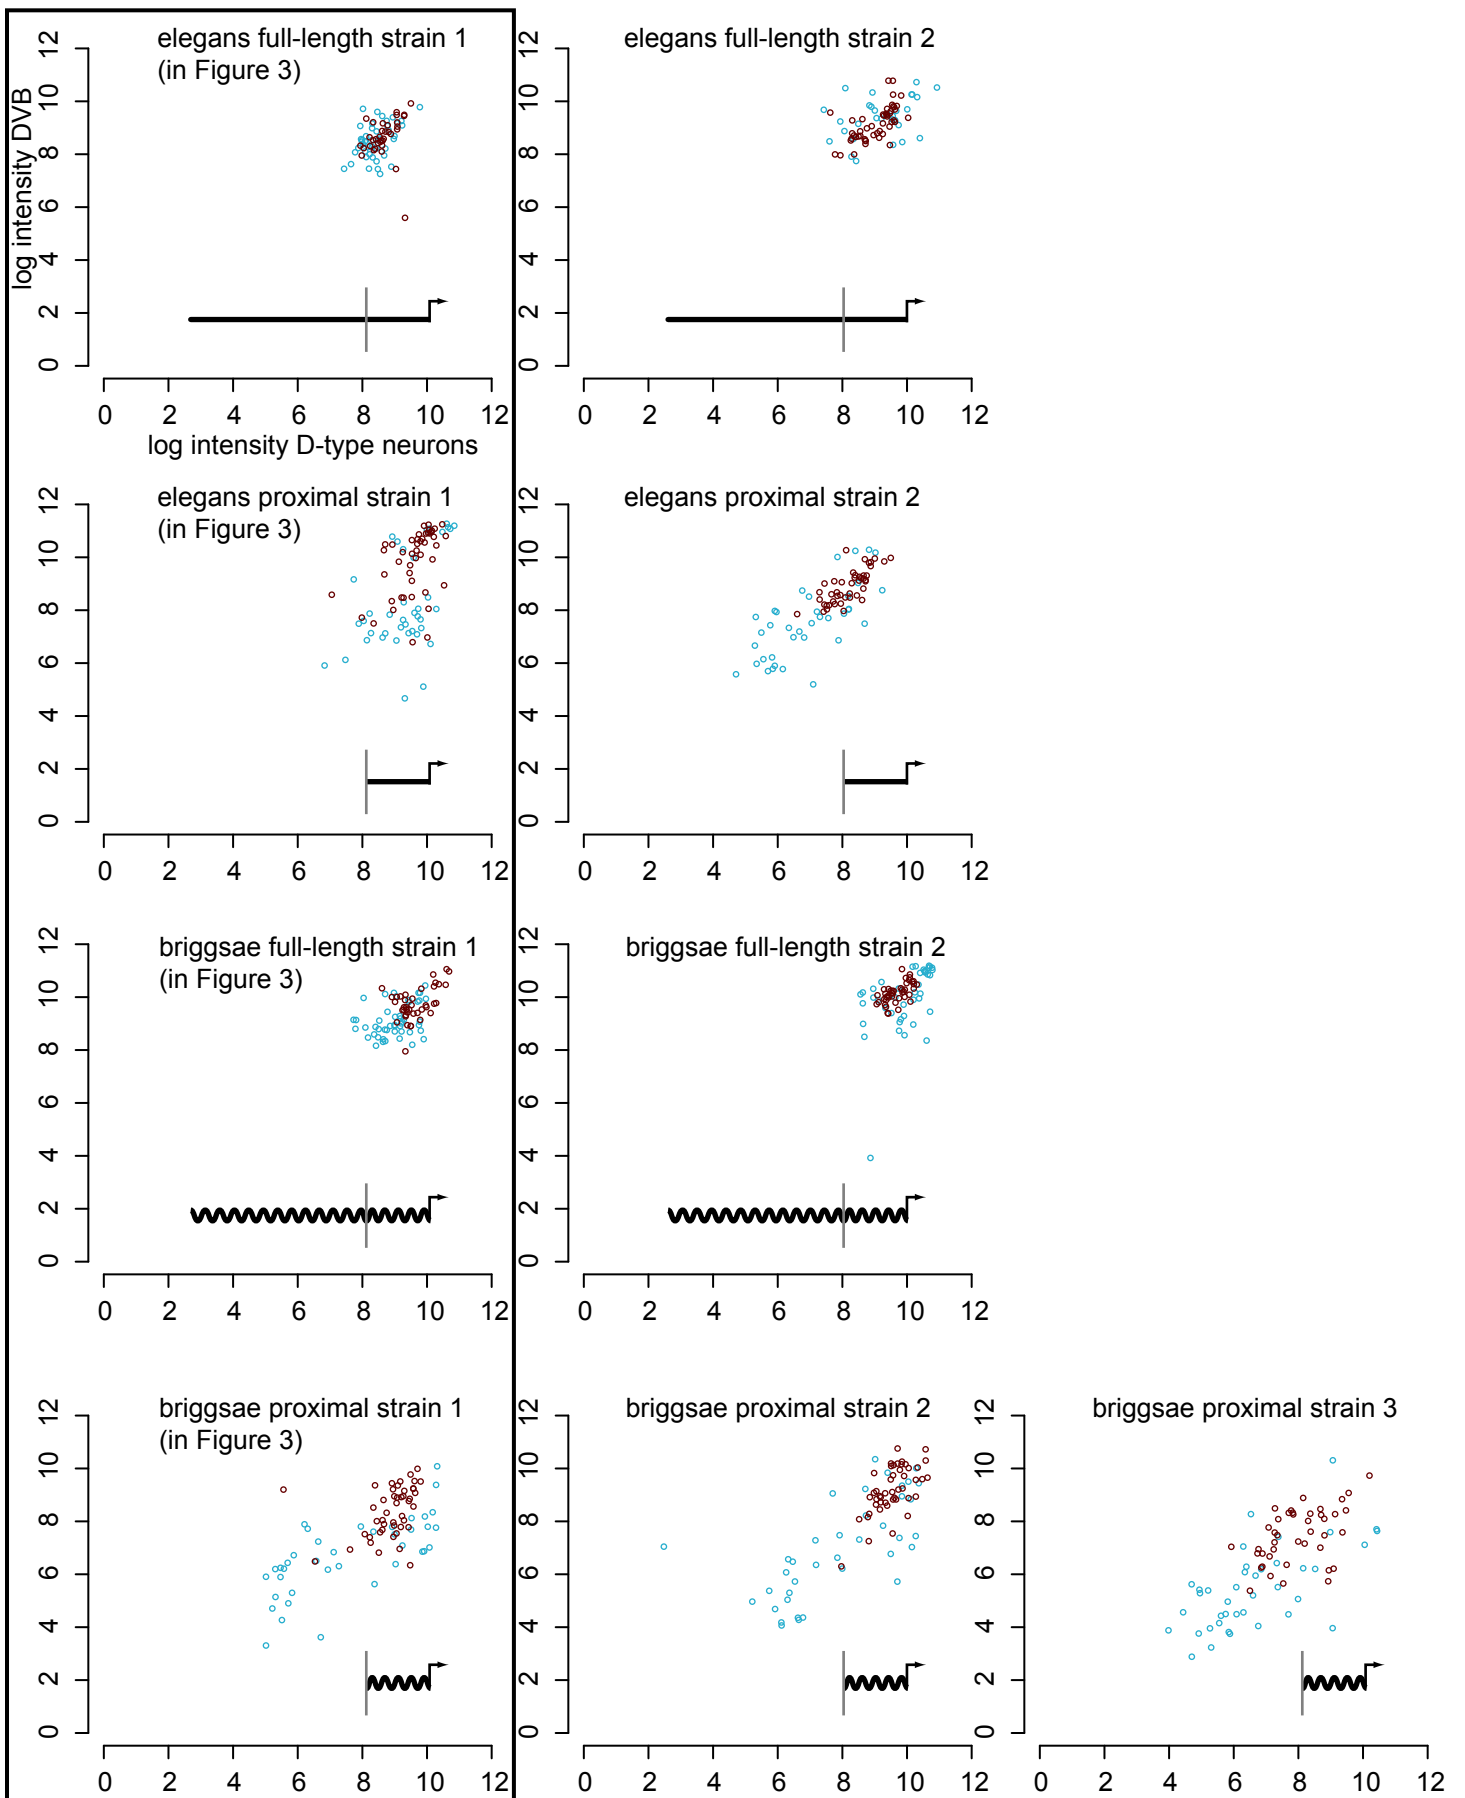

**Figure S4. Multiple independent full-length and proximal strains are consistent in their robustness.** Distribution of fluorescence intensity driven by *C. elegans* full-length and proximal, and *C. briggsae* full-length and proximal promoters in multiple independent strains. The boxed graphs are those presented in Figure 3.
