# Supplementary material for: Distinct Functional Constraints Partition Sequence Conservation in a cis-Regulatory Element
Source: PubMed Central journal article supplement (PMC3107193; doi:10.1371/journal.pgen.1002095), 2011-06-02
Supplement: pgen.1002095.s005.pdf [file pgen.1002095.s005.pdf]

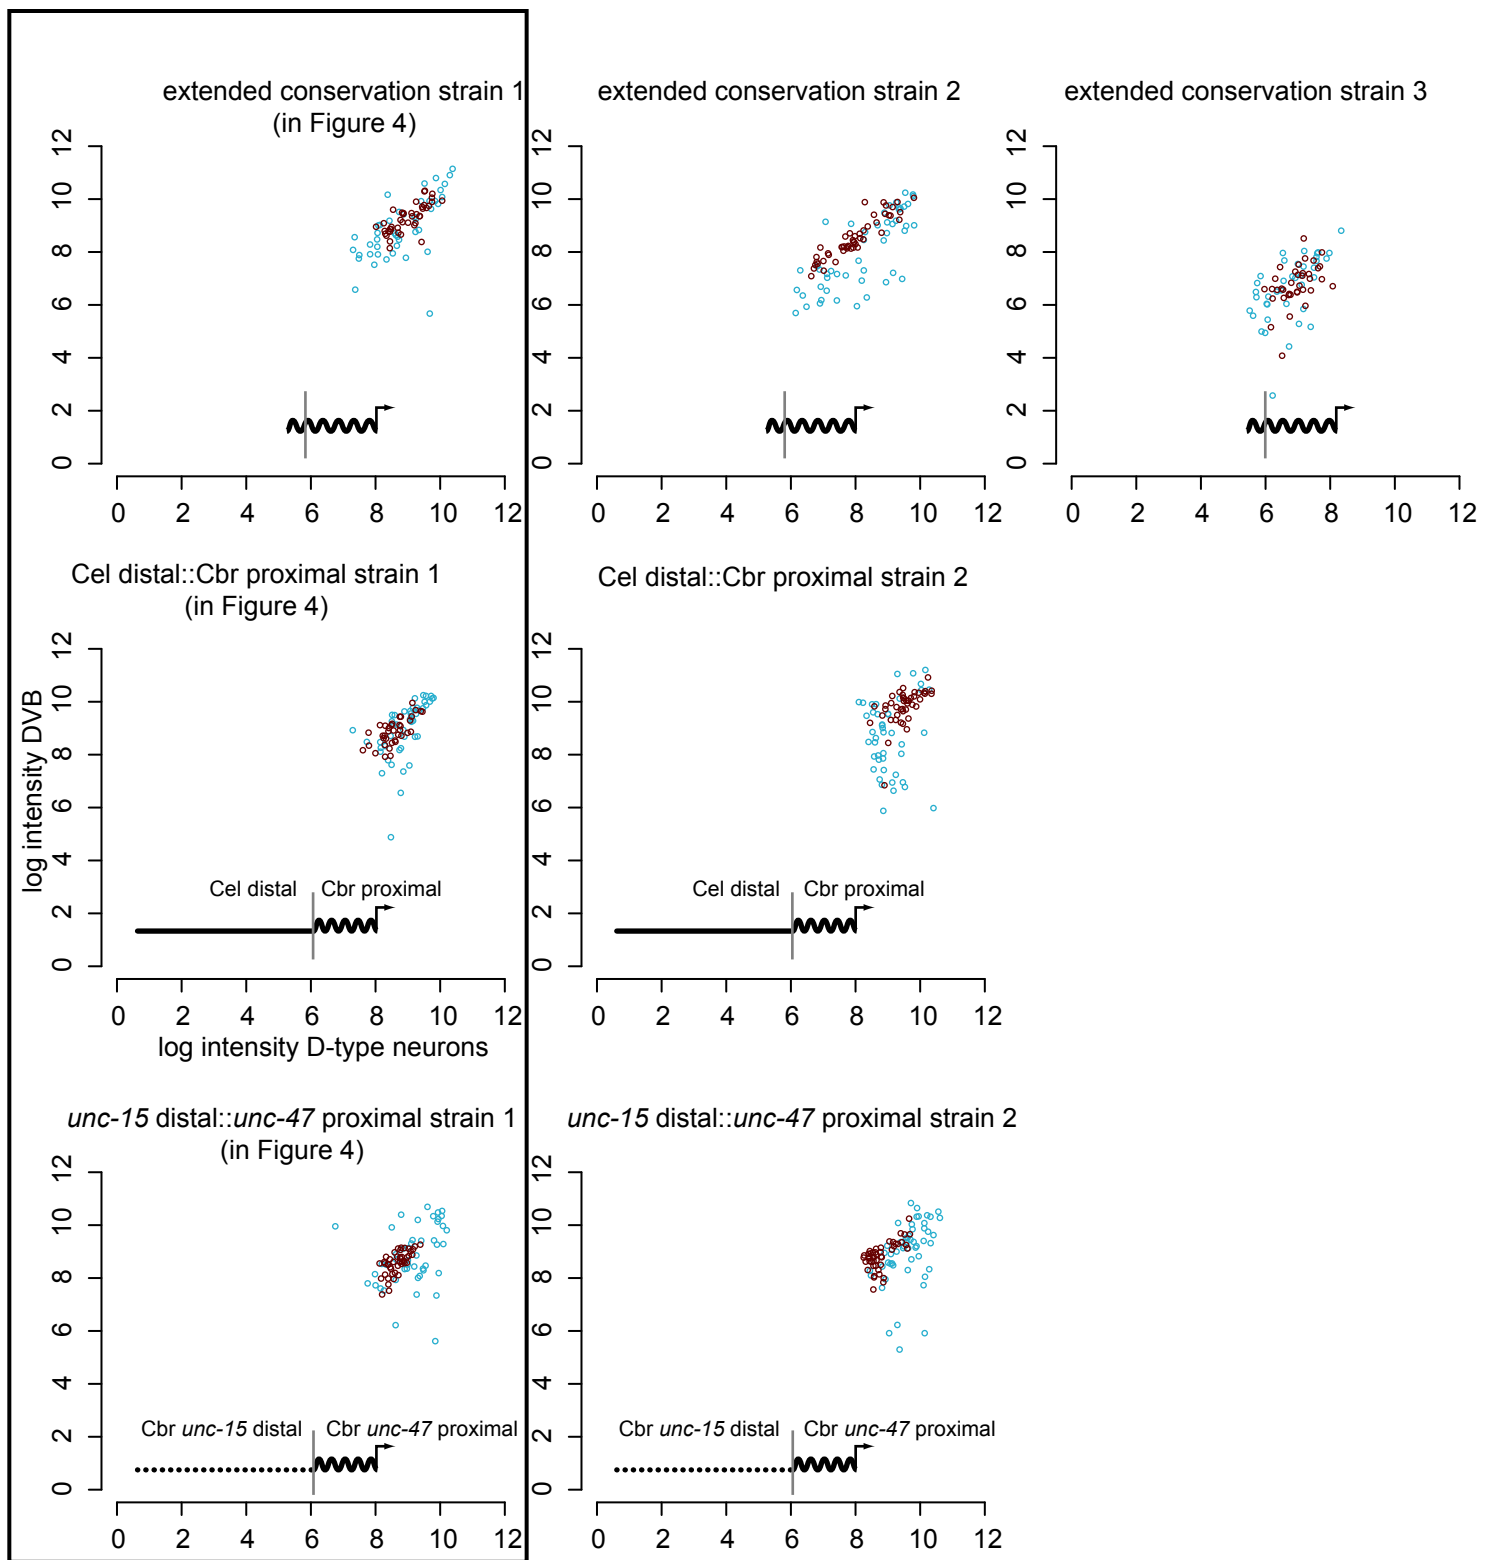

**Figure S5. Multiple independent chimeric and deleted strains are consistent in their robustness.**

Distribution of fluorescence intensity driven by *C. briggsae* extended conservation, chimeric *C. elegans* distal::*C. briggsae* proximal, and chimeric *C. briggsae* *unc-15* distal::*unc-47* proximal promoters in multiple independent strains. The boxed graphs are those presented in Figure 4.
