# Supplementary material for: Distinct Functional Constraints Partition Sequence Conservation in a cis-Regulatory Element
Source: PubMed Central journal article supplement (PMC3107193; doi:10.1371/journal.pgen.1002095), 2011-06-02
Supplement: pgen.1002095.s006.pdf [file pgen.1002095.s006.pdf]

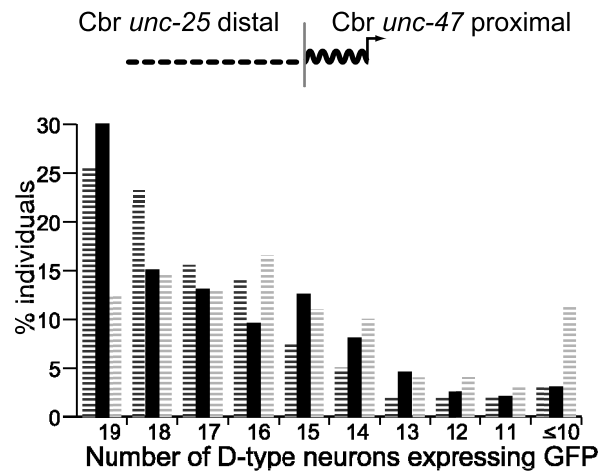

**Figure S6. The *C. briggsae unc-25* distal promoter confers robustness of expression pattern.** Percentage of 200 individuals expressing GFP in indicated number of D-type neurons from a chimeric promoter composed of distal *C. briggsae unc-25* sequence and the *C. briggsae unc-47* proximal promoter (black bars). For comparison, *C. briggsae unc-47* full-length and proximal promoters are shown in black and gray hashed bars, respectively.
