# Supplementary material for: Distinct Functional Constraints Partition Sequence Conservation in a cis-Regulatory Element
Source: PubMed Central journal article supplement (PMC3107193; doi:10.1371/journal.pgen.1002095), 2011-06-02
Supplement: pgen.1002095.s007.pdf [file pgen.1002095.s007.pdf]

**A**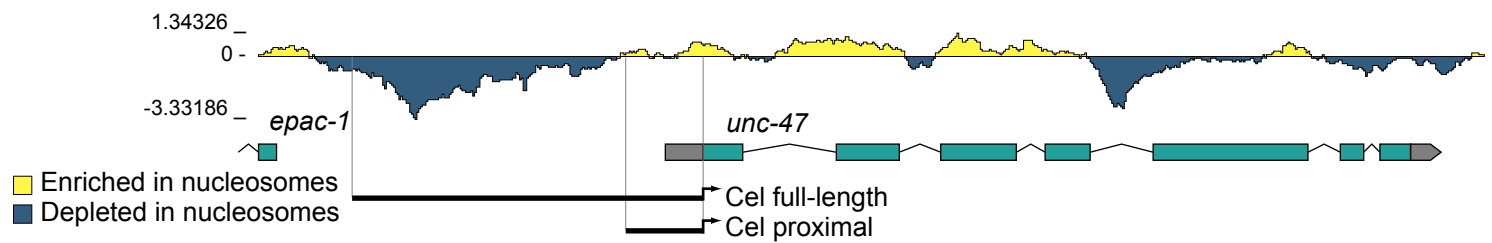**B**

|                                                         |     |     |     |     |     |     |     |     |     |     |     |     |     |     |     |     |     |     |     |     |     |     |     |     |      |     |     |     |     |  |  |  |  |  |  |  |
|---------------------------------------------------------|-----|-----|-----|-----|-----|-----|-----|-----|-----|-----|-----|-----|-----|-----|-----|-----|-----|-----|-----|-----|-----|-----|-----|-----|------|-----|-----|-----|-----|--|--|--|--|--|--|--|
| Over-represented in nucleosome cores                    | ACC | ACG | AGC | ATC | CAC | CAG | CCA | CCC | CCG | CCT | CGC | CGG | CGT | CTC | CTG | GAC | GCC | GGC | GCT | GTC | GTG | TCC | TCG | TCT | TGCT | TGG |     |     |     |  |  |  |  |  |  |  |
| Under-represented in nucleosome cores                   | AAA | AAT | ATA | ATT | GAA | TAA | TAT | TTA | TTT |     |     |     |     |     |     |     |     |     |     |     |     |     |     |     |      |     |     |     |     |  |  |  |  |  |  |  |
| Neither under- nor over-represented in nucleosome cores | AAC | AAG | ACA | ACT | AGA | AGG | AGT | ATG | CAA | CAT | CGA | CTA | CTT | GCG | GAT | GCA | GCC | GGA | GGG | GGT | GTA | GTT | TAC | TAG | TCA  | TGA | TGT | TTC | TTG |  |  |  |  |  |  |  |

**C**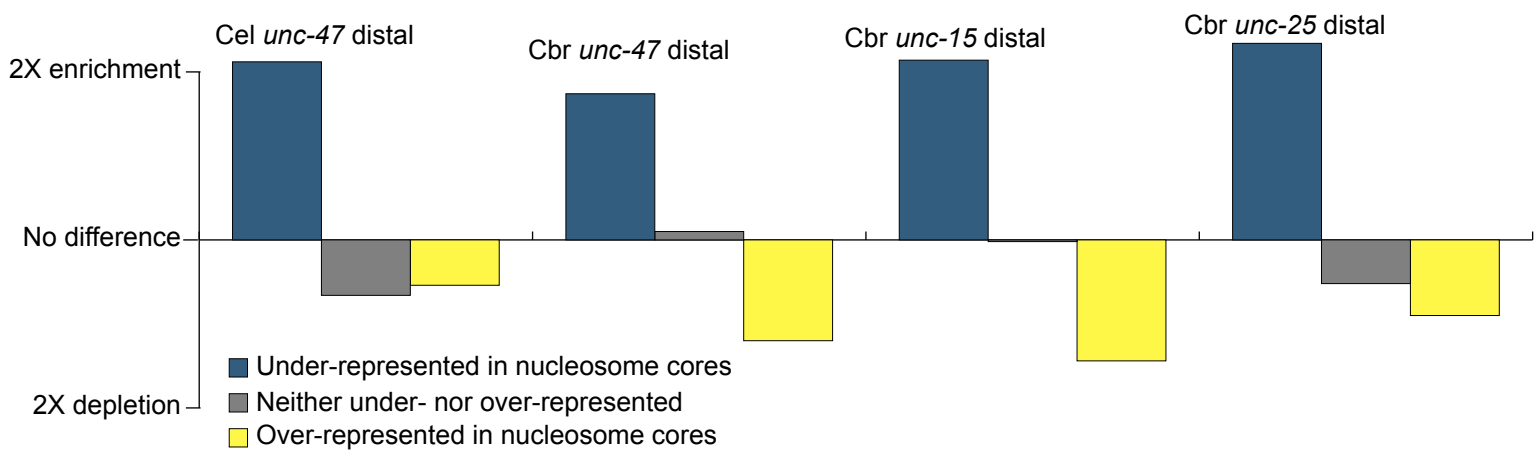**D**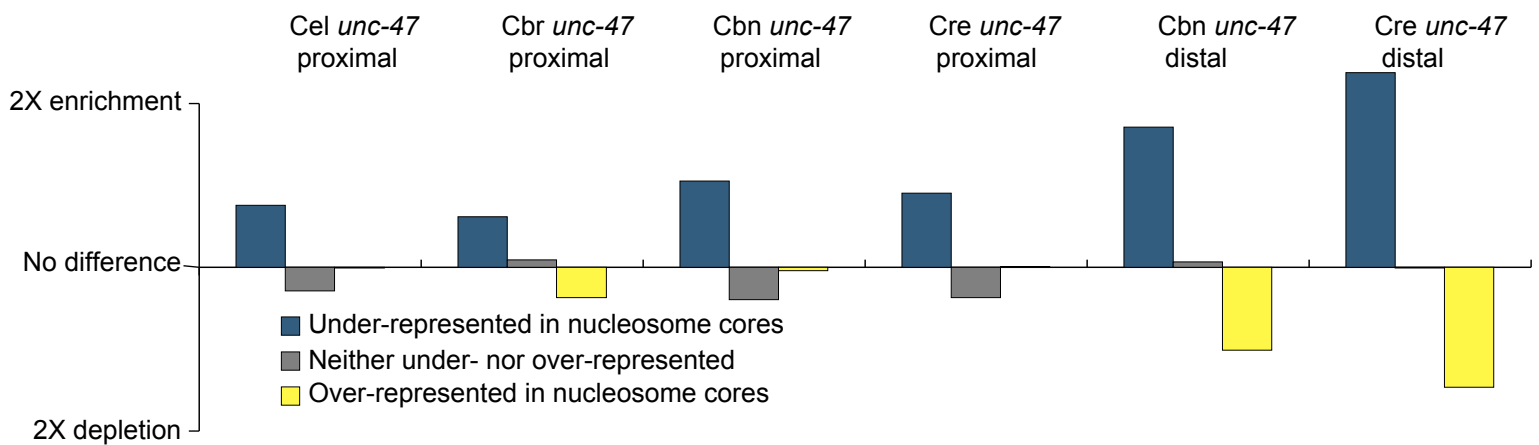**E**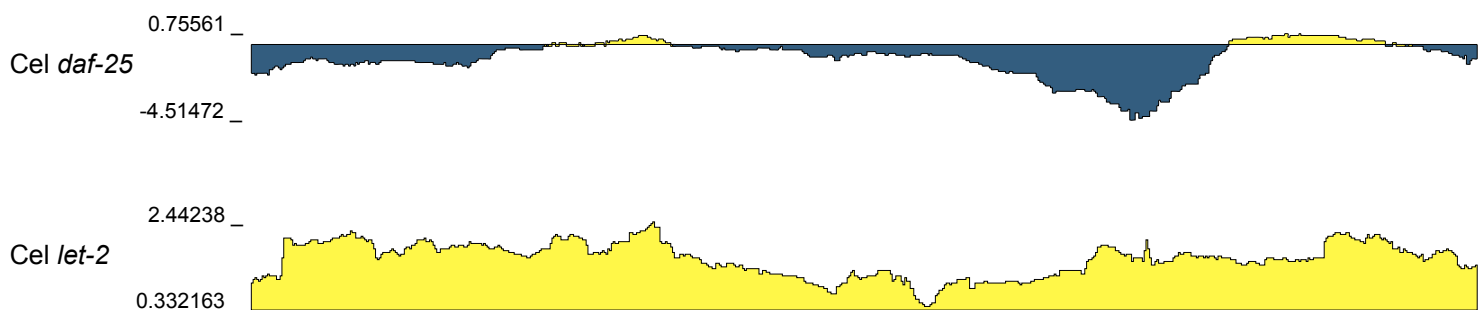

### Figure S7. Nucleosome occupancy in robustness-conferring sequences.

(A) The *unc-47* locus of *C. elegans*, shown from the next annotated upstream gene (*epac-1*) to the end of *unc-47* transcript (teal boxes depict exons, lines depict introns, gray boxes depict UTRs). The extent of *C. elegans* full-length and proximal promoters used in experiments are shown with black bars. Blue and yellow colors represent nucleosome depletion and enrichment, respectively. The data are derived from the “adjusted nucleosome coverage” track as experimentally determined by Valouev et al. (2008) and accessed via UCSC genome browser. The scale of adjusted nucleosome coverage is indicated on the left. (B) Trinucleotide bins, based on the data presented in Valouev et al. (2008) Figure 7. (C) Enrichment/depletion of three categories of trinucleotides in four sequences that confer robustness relative to the sequence of the pPD95.75 vector (log scale). (D) Enrichment/depletion of three categories of trinucleotides in proximal and distal *unc-47* promoters from *C. elegans*, *C. briggsae*, *C. brenneri* and *C. remanei* relative to the sequence of the pPD95.75 vector (log scale). (E) Nucleosome occupancy of the 1kb fragment from the *C. elegans daf-25* locus used in the experiment shown in Figure 5B and of the 1kb fragment from the *C. elegans let-2* locus used in the experiment shown in Figure 5C.
