# Supplementary material for: Distinct Functional Constraints Partition Sequence Conservation in a cis-Regulatory Element
Source: PubMed Central journal article supplement (PMC3107193; doi:10.1371/journal.pgen.1002095), 2011-06-02
Supplement: pgen.1002095.s008.pdf [file pgen.1002095.s008.pdf]

**Table S1. Conservation of proximal promoters and distal sequence among four nematode species**

| Species            | length (bp) of proximal promoter | base pairs of proximal sequence in blocks $\geq 10$ nt 100% conserved with <i>C. elegans</i> | % proximal sequence in blocks $\geq 10$ nt 100% conserved with <i>C. elegans</i> | length of distal sequence used in assays | base pairs of distal sequence in blocks $\geq 10$ nt 100% conserved with <i>C. elegans</i> | % distal sequence in blocks $\geq 10$ nt 100% conserved with <i>C. elegans</i> |
|--------------------|----------------------------------|----------------------------------------------------------------------------------------------|----------------------------------------------------------------------------------|------------------------------------------|--------------------------------------------------------------------------------------------|--------------------------------------------------------------------------------|
| <i>C. briggsae</i> | 254                              | 82                                                                                           | 32.3%                                                                            | 1121                                     | 11                                                                                         | 1.0%                                                                           |
| <i>C. brenneri</i> | 242                              | 92                                                                                           | 38.0%                                                                            | 730                                      | 0                                                                                          | 0.0%                                                                           |
| <i>C. remanei</i>  | 230                              | 88                                                                                           | 38.3%                                                                            | 923                                      | 11                                                                                         | 1.2%                                                                           |
