# Supplementary material for: Distinct Functional Constraints Partition Sequence Conservation in a cis-Regulatory Element
Source: PubMed Central journal article supplement (PMC3107193; doi:10.1371/journal.pgen.1002095), 2011-06-02
Supplement: pgen.1002095.s009.pdf [file pgen.1002095.s009.pdf]

|                                               | Strain                 | Mean at 15°C | Variance at 15°C | Mean at 26°C | Variance at 26°C | K-S test p-value      |
|-----------------------------------------------|------------------------|--------------|------------------|--------------|------------------|-----------------------|
| <i>C. elegans</i> full-length                 | strain 1 (in Figure 3) | 0.706        | 0.146            | 0.635        | 0.311            | 0.2403                |
|                                               | strain 2               | 1.020        | 0.340            | 0.771        | 0.154            | 0.0086                |
| <i>C. elegans</i> proximal                    | strain 1 (in Figure 3) | 1.756        | 1.023            | 1.215        | 0.478            | 0.0094                |
|                                               | strain 2               | 1.608        | 0.726            | 0.769        | 0.155            | 1.2×10 <sup>-6</sup>  |
| <i>C. briggsae</i> full-length                | strain 1 (in Figure 3) | 0.762        | 0.151            | 0.680        | 0.163            | 0.0738                |
|                                               | strain 2               | 1.034*       | 0.170*           | 0.455        | 0.051            | 2.3×10 <sup>-9</sup>  |
| <i>C. briggsae</i> proximal                   | strain 1 (in Figure 3) | 2.188        | 0.848            | 1.025        | 0.415            | 2.8×10 <sup>-9</sup>  |
|                                               | strain 2               | 2.364        | 1.151            | 0.900        | 0.321            | 1.3×10 <sup>-10</sup> |
|                                               | strain 3               | 1.947        | 1.325            | 1.279        | 0.364            | 0.0120                |
| Cel distal::Cbr proximal                      | strain 1 (in Figure 4) | 1.013        | 0.449            | 0.565        | 0.113            | 0.0020                |
|                                               | strain 2               | 1.302        | 0.556            | 0.619        | 0.244            | 2.3×10 <sup>-5</sup>  |
| extended conservation                         | strain 1 (in Figure 4) | 1.262        | 0.515            | 0.664        | 0.111            | 5.6×10 <sup>-5</sup>  |
|                                               | strain 2               | 1.689        | 0.385            | 0.933        | 0.384            | 2.7×10 <sup>-4</sup>  |
|                                               | strain 3               | 1.239        | 0.509            | 0.772        | 0.270            | 6.8×10 <sup>-4</sup>  |
| <i>unc-15</i> distal:: <i>unc-47</i> proximal | strain 1 (in Figure 5) | 1.164        | 0.475            | 0.495        | 0.078            | 5.2×10 <sup>-7</sup>  |
|                                               | strain 2               | 1.059        | 0.596            | 0.562        | 0.115            | 7.8×10 <sup>-4</sup>  |

\*1.155351 and 0.7812112 if including outlier

**Table S2. Comparisons of variation of all strains at 15°C and 26°C. Values in columns 3 to 6 represent the distribution of geometric distances between all data points for a particular strain/treatment and the mean of that strain/treatment. K-S=Kolmogorov – Smirnov test.**
